# Supplementary material for: Effects of dietary protein restriction followed by realimentation on growth performance and liver transcriptome alterations of lamb
Source: PubMed Central journal article supplement (PMC6185953; doi:10.1038/s41598-018-33407-w), 2018-10-12
Supplement: 41598_2018_33407_MOESM1_ESM.pdf [file 41598_2018_33407_MOESM1_ESM.pdf]

**Effects of dietary protein restriction followed by realimentation on growth performance and liver transcriptome alterations of lamb**

K. Cui<sup>#1</sup>, B. Wang<sup>#1</sup>, T. Ma<sup>1</sup>, B. W. Si<sup>1</sup>, N. F. Zhang<sup>1</sup>, Y. Tu<sup>1</sup>, Q. Y. Diao<sup>1\*</sup>

1 Feed Research Institute, Chinese Academy of Agricultural Sciences, National Engineering Research Center of Biological Feed, Beijing, China

\*Corresponding author. E-mail: diaoqiyu@caas.cn

# These authors contributed equally to this work.

**Figure S1. Pearson correlation analysis of the samples**

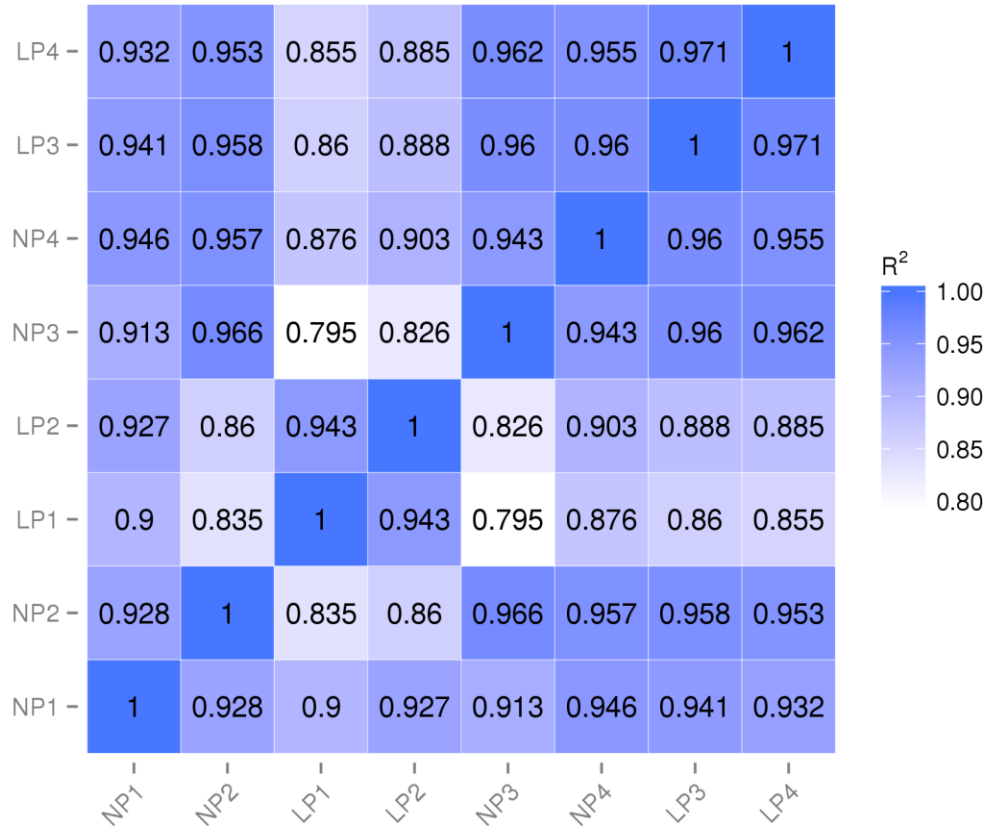

**Table S1. Quality of the sequencing data**

| Treatment | Sample name | Raw reads  | Clean reads (%)    | Q <sub>20</sub> (%) | Total mapped reads (%) |
|-----------|-------------|------------|--------------------|---------------------|------------------------|
| NPL60     | NP1         | 59 304 426 | 57 538 562 (97.02) | 96.40               | 45 118 793 (78.41)     |
|           | NP2         | 52 921 108 | 50 561 072 (95.54) | 95.47               | 39 244 146 (77.62)     |
| LPL60     | LP1         | 55 080 900 | 53 703 926 (97.50) | 96.61               | 41 846 795 (77.92)     |
|           | LP2         | 41 189 720 | 40 057 846 (97.25) | 96.33               | 31 910 236 (79.66)     |
| NPL90     | NP3         | 62 798 110 | 60 592 144 (96.49) | 96.13               | 46 750 467 (77.16)     |
|           | NP4         | 42 917 164 | 41 617 614 (96.97) | 96.41               | 32 459 354 (77.99)     |
| LPL90     | LP3         | 54 828 428 | 53 056 652 (96.77) | 96.65               | 41 253 420 (77.75)     |
|           | LP4         | 60 109 450 | 58 311 854 (97.01) | 96.23               | 45 228 668 (77.56)     |

Q<sub>20</sub>, the number of bases with a phred score >20 reported as the percentage of the total number of bases. Total mapped reads are the number of clean reads that could be mapped onto the *Ovis. Aries* reference genome.

**Table S2. Sequence of primers used in quantitative real-time RT-PCR**

| GENE  | Sequence (5'-3')         | T <sub>m</sub> ( °C) | Fragment length |
|-------|--------------------------|----------------------|-----------------|
| PHGDH | F: ACTTTGGGGAATGCCTCCTG  | 60                   | 198bp           |
|       | R: CAATCATGGTCGGCAGCATC  | 60                   |                 |
| CALU  | F: GACTGGATCCTCCCCTCAGA  | 60                   | 206bp           |
|       | R: ATGTGGGTTCCTCTGTCTGC  | 60                   |                 |
| CYBB  | F: GACCTTGTATGGACGACCCA  | 60                   | 210bp           |
|       | R: TTCCTCATGGAAGAGACCAGT | 60                   |                 |
| DOCK8 | F: CCCAGTTGCCTTGGAAAAGC  | 60                   | 156bp           |
|       | R: TGGTTGTCCTGGGTGTGAAC  | 60                   |                 |
| GSTA1 | F: TGCTGAAAAAGACGCCAAGC  | 60                   | 217bp           |
|       | R: GGCTTTTAGGGCCTTCAGCA  | 60                   |                 |
| FABP4 | F: AAGAAGTGGGTGTGGGCTTT  | 60                   | 144bp           |
|       | R: CCTGGCCCAATTTGAAGGAC  | 60                   |                 |
| GAPDH | F: GTCCGTTGTGGATCTGACCT  | 60                   | 245bp           |
|       | R: TGCTGTAGCCGAATTCATTG  | 60                   |                 |
